# Supplementary material
Source: PubMed Central journal article supplement (PMC4482781)
Supplement: NIHMS684788-supplement-2.pdf [file NIHMS684788-supplement-2.pdf]

**Supplementary Table 1. Clinical and neuropathological characteristics of controls and Alzheimer’s disease (AD) patients participating in this study.**

**1a. Patients participating in histological analysis.**

| Patient Number | Diagnosis | Age | Gender | PMI (hr) | Vascular Risk Factors         | Braak | CERAD    | CDR     | MMSE    | Disease Duration | Source    | A $\beta$ load (%) | SD (%) | PICALM/lectin (%) | SD (%) |
|----------------|-----------|-----|--------|----------|-------------------------------|-------|----------|---------|---------|------------------|-----------|--------------------|--------|-------------------|--------|
| 845            | Control   | 90  | F      | 5        | Hypertension; Atherosclerosis | I     | Negative | 0       | 30      | N/A              | USC ADRC  | 0.50               | 0.08   | 46.44             | 7.89   |
| 870            | Control   | 95  | F      | 9        | Hypertension                  | II    | Negative | 1       | Unknown | N/A              | USC ADRC  | 0.98               | 0.15   | 57.78             | 6.93   |
| 824            | Control   | 87  | F      | 7        | Hypertension                  | 0     | Negative | 0       | 30      | N/A              | USC ADRC  | 0.71               | 0.11   | 64.02             | 10.24  |
| 861            | Control   | 74  | F      | 10       | None                          | I     | Negative | 0       | 18      | N/A              | USC ADRC  | 0.23               | 0.04   | 57.01             | 9.69   |
| 907            | Control   | 84  | M      | 3        | None                          | I–II  | Negative | 0       | 28      | N/A              | USC ADRC  | 0.91               | 0.10   | 50.88             | 9.16   |
| 804            | Control   | 82  | M      | 9        | None                          | 0     | Negative | 0       | 28      | N/A              | USC ADRC  | 0.34               | 0.04   | 58.58             | 5.86   |
| 877            | Control   | 93  | M      | 3.75     | None                          | I     | Sparse   | Unknown | 18      | N/A              | USC ADRC  | 0.71               | 0.13   | 78.84             | 10.25  |
| 559            | Control   | 70  | M      | 10.5     | Atherosclerosis               | I     | Negative | 0       | Unknown | N/A              | USC ADRC  | 0.32               | 0.04   | 48.36             | 5.80   |
| 720            | Control   | 63  | M      | 3.5      | Hypertension                  | 0     | Negative | 0       | Unknown | N/A              | USC ADRC  | 0.37               | 0.06   | 70.34             | 11.25  |
| 10473384       | Control   | 84  | M      | 5        | Hypertension                  | III   | Negative | Unknown | 26      | N/A              | Rush ADRC | 1.67               | 0.17   | 57.24             | 9.73   |
| 20683921       | Control   | 85  | F      | 6        | Hypertension                  | III   | Sparse   | Unknown | 26      | N/A              | Rush ADRC | 0.54               | 0.05   | 44.94             | 4.49   |
| 20993308       | Control   | 83  | F      | 1        | None                          | I     | Negative | Unknown | 26      | N/A              | Rush ADRC | 0.61               | 0.07   | 59.17             | 5.33   |
| 11072071       | Control   | 88  | M      | 8.5      | Hypertension                  | II    | Negative | Unknown | 27      | N/A              | Rush ADRC | 0.17               | 0.02   | 45.08             | 8.11   |
| 15844425       | Control   | 77  | M      | 8        | Hypertension                  | III   | Negative | Unknown | 28      | N/A              | Rush ADRC | 2.29               | 0.34   | 64.32             | 7.08   |
| 11342432       | Control   | 90  | M      | 2.5      | None                          | II    | Negative | Unknown | 29      | N/A              | Rush ADRC | 0.20               | 0.03   | 54.88             | 7.13   |
| 11190734       | Control   | 77  | M      | 4.5      | None                          | II    | Negative | Unknown | 27      | N/A              | Rush ADRC | 0.25               | 0.05   | 68.57             | 5.49   |
| 10383017       | Control   | 88  | F      | 5        | Hypertension                  | I     | Negative | Unknown | 27      | N/A              | Rush ADRC | 0.18               | 0.03   | 64.40             | 10.30  |
| 20998065       | Control   | 82  | M      | 8.5      | None                          | I     | Negative | Unknown | 28      | N/A              | Rush ADRC | 0.50               | 0.04   | 69.30             | 6.24   |
| 11697592       | Control   | 78  | M      | 9.75     | None                          | I     | Sparse   | Unknown | 29      | N/A              | Rush ADRC | 0.61               | 0.05   | 56.05             | 5.61   |
| 20800682       | Control   | 85  | F      | 5.75     | None                          | II    | Negative | Unknown | 30      | N/A              | Rush ADRC | 0.71               | 0.06   | 51.48             | 5.66   |
| 785            | AD        | 99  | F      | 12.3     | Atherosclerosis               | III   | Moderate | 2       | Unknown | 7 years          | USC ADRC  | 6.80               | 0.82   | 21.12             | 1.69   |
| 896            | AD        | 83  | F      | 13.25    | Atherosclerosis, CAA          | V–VI  | Moderate | 2       | 0       | 5 years          | USC ADRC  | 14.38              | 1.58   | 21.59             | 3.89   |
| 800            | AD        | 96  | F      | 5        | Atherosclerosis, CAA          | V     | Frequent | 3       | Unknown | 9 years          | USC ADRC  | 7.62               | 1.22   | 22.88             | 2.06   |
| 689            | AD        | 78  | F      | 7        | None                          | V     | Moderate | 2       | Unknown | 8 years          | USC ADRC  | 10.47              | 1.47   | 16.66             | 2.33   |
| 719            | AD        | 92  | F      | 4.25     | Atherosclerosis, CAA          | V–VI  | Frequent | 2       | Unknown | 10 years         | USC ADRC  | 12.72              | 2.16   | 16.22             | 2.27   |

| Patient Number | Diagnosis | Age | Gender | PMI (hr) | Vascular Risk Factors | Braak | CERAD    | CDR     | MMSE    | Disease Duration | Source    | A $\beta$ load (%) | SD (%) | PICALM/lectin (%) | SD (%) |
|----------------|-----------|-----|--------|----------|-----------------------|-------|----------|---------|---------|------------------|-----------|--------------------|--------|-------------------|--------|
| 728            | AD        | 86  | M      | 10       | Atherosclerosis, CAA  | IV    | Moderate | 1       | Unknown | Unknown          | USC ADRC  | 8.32               | 1.42   | 25.07             | 3.51   |
| 905            | AD        | 81  | M      | 8        | Atherosclerosis       | III   | Moderate | 2       | 11      | 5 years          | USC ADRC  | 5.24               | 0.47   | 28.08             | 2.81   |
| 890            | AD        | 71  | M      | 5.5      | None                  | V–VI  | Moderate | 2       | 8       | 4 years          | USC ADRC  | 17.20              | 2.75   | 10.57             | 0.95   |
| 796            | AD        | 76  | M      | 5        | Atherosclerosis, CAA  | V     | Moderate | 3       | 0       | 2 years          | USC ADRC  | 11.65              | 1.28   | 14.20             | 1.28   |
| 825            | AD        | 68  | F      | 9.75     | Hypertension          | III   | Moderate | 1       | 15      | 4 years          | USC ADRC  | 4.99               | 0.60   | 29.14             | 5.25   |
| 902            | AD        | 91  | F      | 3.25     | Atherosclerosis       | V–VI  | Frequent | 3       | 6       | 3 years          | USC ADRC  | 18.57              | 1.86   | 6.25              | 1.00   |
| 900            | AD        | 87  | M      | 5.5      | Atherosclerosis, CAA  | V–VI  | Frequent | 2       | 19      | Unknown          | USC ADRC  | 9.45               | 1.70   | 17.01             | 3.06   |
| 799            | AD        | 95  | F      | 6        | Atherosclerosis       | V     | Frequent | 2       | Unknown | 17 years         | USC ADRC  | 11.20              | 1.68   | 22.56             | 3.16   |
| 854            | AD        | 87  | F      | 5.5      | Atherosclerosis, CAA  | V     | Moderate | 2       | 0       | 17 years         | USC ADRC  | 5.00               | 0.75   | 31.31             | 3.76   |
| 888            | AD        | 51  | F      | 6        | None                  | V–VI  | Frequent | Unknown | Unknown | 1 month          | USC ADRC  | 7.26               | 0.94   | 38.61             | 3.09   |
| 427            | AD        | 74  | M      | 9        | Atherosclerosis, CAA  | V     | Frequent | 3       | Unknown | 15 years         | USC ADRC  | 13.53              | 2.30   | 21.42             | 2.14   |
| 851            | AD        | 87  | F      | 4.75     | Atherosclerosis       | V     | Frequent | 3       | 16      | 6 months         | USC ADRC  | 12.70              | 2.29   | 28.00             | 4.20   |
| 808            | AD        | 98  | M      | 6        | Hypertension, CAA     | V–VI  | Frequent | 1       | 28      | 2 years          | USC ADRC  | 14.11              | 1.13   | 36.18             | 3.62   |
| 910            | AD        | 100 | F      | 4.75     | Atherosclerosis       | IV    | Moderate | 1       | 11      | Unknown          | USC ADRC  | 7.55               | 1.06   | 28.13             | 3.66   |
| 911            | AD        | 88  | M      | 7        | Atherosclerosis       | III   | Moderate | 1       | 19      | Unknown          | USC ADRC  | 3.40               | 0.61   | 26.97             | 2.70   |
| 915            | AD        | 86  | F      | 7.5      | Atherosclerosis, CAA  | V     | Frequent | 3       | Unknown | Unknown          | USC ADRC  | 9.91               | 1.19   | 23.52             | 3.53   |
| 20195344       | AD        | 94  | F      | 5        | Hypertension          | IV    | Moderate | Unknown | 11      | 2 years          | RUSH ADRC | 5.17               | 0.93   | 19.74             | 2.96   |
| 10248033       | AD        | 88  | M      | 18       | Hypertension          | III   | Moderate | Unknown | 12      | 2 years          | RUSH ADRC | 0.66               | 0.11   | 30.53             | 3.66   |
| 11606935       | AD        | 98  | M      | 4        | Hypertension          | III   | Moderate | Unknown | 18      | 1 years          | RUSH ADRC | 4.31               | 0.78   | 32.30             | 3.88   |
| 21403995       | AD        | 86  | F      | 21       | Hypertension          | III   | Frequent | Unknown | 15      | 3 years          | RUSH ADRC | 2.51               | 0.33   | 30.08             | 3.61   |
| 20865035       | AD        | 101 | F      | 8.75     | Hypertension          | IV    | Moderate | Unknown | 19      | 2 years          | RUSH ADRC | 11.44              | 1.94   | 16.35             | 1.64   |
| 20254902       | AD        | 94  | M      | 6        | Hypertension          | IV    | Moderate | Unknown | 24      | 2 years          | RUSH ADRC | 9.92               | 1.79   | 23.66             | 1.89   |
| 20187042       | AD        | 84  | F      | 13       | Hypertension          | III   | Moderate | Unknown | 22      | 6 months         | RUSH ADRC | 4.94               | 0.74   | 22.75             | 3.41   |
| 20506587       | AD        | 92  | F      | 4.25     | None                  | III   | Moderate | Unknown | Unknown | 2 years          | RUSH ADRC | 2.16               | 0.28   | 40.85             | 6.13   |
| 11326252       | AD        | 95  | M      | 3.25     | Hypertension          | IV    | Moderate | Unknown | 20      | 3 years          | RUSH ADRC | 9.92               | 1.79   | 30.24             | 4.84   |

**1b. Patients participating in a rapid brain autopsy study to establish brain endothelial cell (BEC) cultures.**

| <b>Patient Number</b> | <b>Diagnosis</b> | <b>Age</b> | <b>Gender</b> | <b>PMI (hr)</b> | <b>Vascular Risk Factors</b>             | <b>Braak</b> | <b>CERAD</b> | <b>CDR</b> | <b>Source</b>  |
|-----------------------|------------------|------------|---------------|-----------------|------------------------------------------|--------------|--------------|------------|----------------|
| 17                    | Control          | 59         | F             | 4.5             | None                                     | 0            | Negative     | 0          | Rochester ADRC |
| 29                    | Control          | 96         | F             | 6               | None                                     | 0            | Negative     | 0          | Rochester ADRC |
| 38                    | Control          | 58         | F             | 5.5             | None                                     | 0            | Negative     | 0          | Rochester ADRC |
| 39                    | Control          | 72         | M             | 4.3             | Atherosclerosis<br>Myocardial Infarction | 0-I          | Sparse       | 0          | Rochester ADRC |
| 40                    | Control          | 73         | M             | 4.7             | Atherosclerosis                          | I-II         | Negative     | 0          | Rochester ADRC |
| 804                   | Control          | 82         | M             | 9               | None                                     | 0            | None         | 0          | USC ADRC       |
| 845                   | Control          | 90         | F             | 5               | Hypertension<br>Atherosclerosis          | I            | Sparse       | 0          | USC ADRC       |
| 877                   | Control          | 93         | M             | 3.75            | None                                     | I            | Sparse       | Unknown    | USC ADRC       |
| 37                    | AD               | 80         | F             | 3.0             | Atherosclerosis                          | V-VI         | Frequent     | 3          | Rochester ADRC |
| 41                    | AD               | 80         | F             | 3.1             | None                                     | V-VI         | Frequent     | 2          | Rochester ADRC |
| 42                    | AD               | 80         | F             | 5.2             | None                                     | III-V        | Moderate     | 2          | Rochester ADRC |
| 43                    | AD               | 77         | M             | 2.8             | None                                     | V-VI         | Frequent     | 2          | Rochester ADRC |
| 49                    | AD               | 78         | M             | 5.0             | Atherosclerosis                          | V-VI         | Frequent     | 2          | Rochester ADRC |
| 799                   | AD               | 95         | F             | 6               | Atherosclerosis                          | V            | Frequent     | 2          | USC ADRC       |
| 854                   | AD               | 87         | F             | 5.5             | Atherosclerosis                          | V            | Moderate     | 2          | USC ADRC       |
| 888                   | AD               | 51         | F             | 6               | None                                     | V-VI         | Frequent     | Unknown    | USC ADRC       |
